# Supplementary material for: Avian Cell Line DuckCelt®-T17 Is an Efficient Production System for Live-Attenuated Human Metapneumovirus Vaccine Candidate Metavac®
Source: MDPI journal article supplement (doi:10.3390/vaccines9101190), 2021-10-16
Supplement: s1 [file s1]

**Supplementary Table S1** – Induction of neutralizing antibodies by Metavac® viruses in mice

| Prime infection | Inoculum (log <sub>10</sub> TCID <sub>50</sub> ) | Boost 30-day post-prime | Inoculum (log <sub>10</sub> TCID <sub>50</sub> ) | Reciprocal neutralization titer (n=3) <sup>a</sup> |                    |
|-----------------|--------------------------------------------------|-------------------------|--------------------------------------------------|----------------------------------------------------|--------------------|
|                 |                                                  |                         |                                                  | Against the rC-85473-GFP (LLC) virus               |                    |
|                 |                                                  |                         |                                                  | 29 days post-prime                                 | 21 days post-boost |
| Mock            | -                                                | rC-85473-GFP            | 5.7                                              | < 5                                                | 10                 |
|                 |                                                  | Mock                    | -                                                | < 5                                                | <5                 |
| rC-85473-GFP    | 5.7                                              | Metavac® LLC            | 5.7                                              | 5                                                  | >160               |
|                 |                                                  | Metavac® T17            | 5.7                                              | 5                                                  | >160               |
|                 |                                                  | Mock                    | -                                                | 5                                                  | 5                  |

<sup>a</sup>Three pools of sera from two mice were tested for neutralization against the rC-85473-GFP (LLC) virus, resulting in three biological replicates per group. One day before prime infection, the naïve status of mice was confirmed by a microneutralization assay from a pool of sera.
